# Supplementary material for: Ecological and Reproductive Cycles Drive Henipavirus Seroprevalence in the African Straw‐Coloured Fruit Bat ( Eidolon helvum )
Source: PubMed Central journal article supplement (PMC11554383; doi:10.1002/ece3.70555), 2024-11-11
Supplement: ECE3-14-e70555-s002.pdf [file ECE3-14-e70555-s002.pdf]

**Ecological and reproductive cycles drive henipavirus seroprevalence in the African straw-coloured fruit bat (*Eidolon helvum*)**

**Supplementary Tables S1-8**

**Supplementary Table S1.** Characteristics and locations of sampling sites included in the study.

| Site           | Type             | Coordinates            | Number of bats | Sampling months                                                  | Total <i>n</i> |
|----------------|------------------|------------------------|----------------|------------------------------------------------------------------|----------------|
| Accra          | Wild, urban      | 5.5882,<br>-0.18239    | Up to ~500,000 | August 2019, December 2019, March 2020, June 2020, October 2020  | 496            |
| Kumasi         | Wild, peri-urban | 6.70002,<br>-1.62493   | Up to ~500,000 | October 2019, January 2020, April 2020, July 2020                | 433            |
| Akosombo       | Wild, rural      | 6.171256,<br>0.064621  | Unknown        | November 2019, February 2020, May 2020, August 2020              | 386            |
| Captive colony | Captive          | 5.625303,<br>-0.203029 | ~200           | February 2019, July 2019, February 2020, July 2020, October 2020 | 775            |

**Supplementary Table S2.** Summary of demographic (sex and age) characteristics of samples from each site, with proportions (as percentages of total sample) presented in parentheses.

| Site             | Sampling month | Total | Females  | Males    | Adults    | Sexually Immature | Juveniles |
|------------------|----------------|-------|----------|----------|-----------|-------------------|-----------|
| Accra (urban)    | August 2019    | 87    | 25 (29%) | 62 (71%) | 43 (49%)  | 41 (47%)          | 3 (3%)    |
| Accra (urban)    | December 2019  | 106   | 29 (27%) | 77 (73%) | 74 (70%)  | 32 (30%)          | 0 (0%)    |
| Accra (urban)    | March 2020     | 90    | 6 (7%)   | 84 (93%) | 74 (82%)  | 16 (18%)          | 0 (0%)    |
| Accra (urban)    | June 2020      | 98    | 7 (7%)   | 91 (93%) | 86 (88%)  | 12 (12%)          | 0 (0%)    |
| Accra (urban)    | October 2020   | 115   | 37 (32%) | 78 (68%) | 90 (78%)  | 25 (22%)          | 0 (0%)    |
| Akosombo (rural) | November 2019  | 101   | 39 (39%) | 62 (61%) | 46 (46%)  | 55 (54%)          | 0 (0%)    |
| Akosombo (rural) | February 2020  | 115   | 22 (19%) | 93 (81%) | 81 (70%)  | 34 (30%)          | 0 (0%)    |
| Akosombo (rural) | May 2020       | 74    | 6 (8%)   | 68 (92%) | 67 (91%)  | 7 (9%)            | 0 (0%)    |
| Akosombo (rural) | August 2020    | 96    | 34 (35%) | 62 (65%) | 64 (67%)  | 32 (33%)          | 0 (0%)    |
| Kumasi (urban)   | October 2019   | 126   | 55 (44%) | 71 (56%) | 70 (56%)  | 56 (44%)          | 0 (0%)    |
| Kumasi (urban)   | January 2020   | 100   | 37 (37%) | 63 (63%) | 93 (93%)  | 7 (7%)            | 0 (0%)    |
| Kumasi (urban)   | April 2020     | 99    | 24 (24%) | 75 (76%) | 81 (82%)  | 18 (18%)          | 0 (0%)    |
| Kumasi (urban)   | July 2020      | 108   | 51 (47%) | 57 (53%) | 40 (37%)  | 68 (63%)          | 0 (0%)    |
| Captive colony   | February 2019  | 151   | 80 (53%) | 70 (46%) | 103 (68%) | 48 (32%)          | 0 (0%)    |
| Captive colony   | July 2019      | 146   | 76 (52%) | 69 (47%) | 104 (71%) | 42 (29%)          | 0 (0%)    |
| Captive colony   | February 2020  | 162   | 84 (52%) | 78 (48%) | 114 (70%) | 48 (30%)          | 0 (0%)    |
| Captive colony   | July 2020      | 156   | 85 (55%) | 71 (45%) | 121 (78%) | 35 (22%)          | 0 (0%)    |
| Captive colony   | October 2020   | 160   | 88 (55%) | 72 (45%) | 124 (78%) | 31 (19%)          | 5 (3%)    |

**Supplementary Table S3.** List of viral antigens included in the Luminex panel.

| Family          | Genus                  | Virus                                                        | Abbreviation |
|-----------------|------------------------|--------------------------------------------------------------|--------------|
| Paramyxoviridae | <i>Henipavirus</i>     | <b>Kumasi</b> virus / <i>E. helvum</i> /GHA/2009/GH-M74a     | GhV          |
| Paramyxoviridae | <i>Henipavirus</i>     | <b>Hendra</b> virus / <i>E. caballus</i> /AUS/1994           | HeV          |
| Paramyxoviridae | <i>Henipavirus</i>     | <b>Nipah</b> virus / <i>H. sapiens</i> /MYS/2000             | NiV          |
| Paramyxoviridae | <i>Henipavirus</i>     | <b>Cedar</b> virus / <i>Pteropus sp.</i> /AUS/2012/CG1a      | CedV         |
| Paramyxoviridae | <i>Henipavirus</i>     | <b>Mojiang</b> virus / <i>R. sladeni</i> /CHN/2014/Tongguan1 | MojV         |
| Paramyxoviridae | <i>Pararubulavirus</i> | <b>Menangle</b> virus / <i>S. domesticus</i> /AUS/2001       | MenV         |

**Supplementary Table S4.** Results of paired Wilcoxon tests comparing each antigen's raw MFI distribution to the background ("mock") distribution.

| Antigen | V-statistic | <i>p</i> -value |
|---------|-------------|-----------------|
| GhV     | 2043561     | <0.00001        |
| NiV     | 2183765     | <0.00001        |
| HeV     | 1529613     | <0.00001        |
| MojV    | 2185060     | <0.00001        |
| CedV    | 1189897     | 0.00019         |
| MenV    | 1136206     | 0.08923         |

**Supplementary Table S5.** Smoothing and parametric terms included in generalised additive mixed models (GAMMs) of HeV, MojV, and CedV log-MFI values across the three wild roosts and their respective: effective degrees of freedom (edf), F values (*F*), and significance levels (*p*-value); and estimates, standard errors (*SE*), *t* statistics (*t* values), and significance levels (*pr*[>*t*]).

| <b>Antigen</b>      |                              |                 |                  |                       |                                |
|---------------------|------------------------------|-----------------|------------------|-----------------------|--------------------------------|
| HeV                 | <b>Smoothing term</b>        |                 | <b>edf</b>       | <b><i>F</i></b>       | <b><i>p</i>-value</b>          |
|                     | s(Time):Accra urban roost    |                 | 3.64             | 28.96                 | <0.00001                       |
|                     | s(Time):Akosombo rural roost |                 | 3.65             | 7.04                  | <0.0001                        |
|                     | s(Time):Kumasi urban roost   |                 | 1.20             | 0.58                  | 0.5780                         |
|                     | <b>Parametric term</b>       | <b>Estimate</b> | <b><i>SE</i></b> | <b><i>t</i> value</b> | <b><i>pr</i>(&gt;<i>t</i>)</b> |
|                     | Sex (Male)                   | 0.02            | 0.04             | 0.40                  | 0.6887                         |
|                     | Age (Juvenile)               | -0.64           | 0.36             | -1.79                 | 0.0742                         |
|                     | Age (Sexually immature)      | -0.10           | 0.05             | -2.00                 | 0.0454                         |
| Mass/Forearm Length | 0.05                         | 0.07            | 0.70             | 0.4820                |                                |
| MojV                | <b>Smoothing term</b>        |                 | <b>edf</b>       | <b><i>F</i></b>       | <b><i>p</i>-value</b>          |
|                     | s(Time):Accra urban roost    |                 | 3.78             | 11.98                 | <0.00001                       |
|                     | s(Time):Akosombo rural roost |                 | 2.28             | 10.12                 | <0.0001                        |
|                     | s(Time):Kumasi urban roost   |                 | 3.75             | 6.40                  | 0.0005                         |
|                     | <b>Parametric term</b>       | <b>Estimate</b> | <b><i>SE</i></b> | <b><i>t</i> value</b> | <b><i>pr</i>(&gt;<i>t</i>)</b> |
|                     | Sex (Male)                   | 0.10            | 0.05             | 2.14                  | 0.0329                         |
|                     | Age (Juvenile)               | -0.15           | 0.44             | -0.35                 | 0.7290                         |
|                     | Age (Sexually immature)      | -0.32           | 0.06             | -5.47                 | <0.00001                       |
| Mass/Forearm Length | -0.30                        | 0.08            | -3.68            | 0.0002                |                                |
| CedV                | <b>Smoothing term</b>        |                 | <b>edf</b>       | <b><i>F</i></b>       | <b><i>p</i>-value</b>          |
|                     | s(Time):Accra urban roost    |                 | 3.51             | 42.47                 | <0.00001                       |
|                     | s(Time):Akosombo rural roost |                 | 3.51             | 4.82                  | 0.0020                         |
|                     | s(Time):Kumasi urban roost   |                 | 1.91             | 2.95                  | 0.0335                         |
|                     | <b>Parametric term</b>       | <b>Estimate</b> | <b><i>SE</i></b> | <b><i>t</i> value</b> | <b><i>pr</i>(&gt;<i>t</i>)</b> |
|                     | Sex (Male)                   | -0.00           | 0.02             | -0.10                 | 0.9170                         |
|                     | Age (Juvenile)               | -0.12           | 0.16             | -0.74                 | 0.4580                         |
|                     | Age (Sexually immature)      | 0.02            | 0.02             | 0.83                  | 0.4100                         |
| Mass/Forearm Length | 0.02                         | 0.03            | 0.85             | 0.3970                |                                |

**Supplementary Table S6.** Smoothing and parametric terms included in generalised additive mixed models (GAMMs) of log-MFI values for GhV, NiV, HeV, MojV, and CedV in captive adult bats, and their respective: effective degrees of freedom (edf), F values (*F*), and significance levels (*p*-value); and estimates, standard errors (*SE*), t statistics (*t* values), and significance levels (*pr*[>*t*]).

| <b>Antigen</b> |                        |                 |                  |                       |                                |
|----------------|------------------------|-----------------|------------------|-----------------------|--------------------------------|
| GhV            | <b>Smoothing term</b>  |                 | <b>edf</b>       | <b><i>F</i></b>       | <b><i>p</i>-value</b>          |
|                | s(Time):Female         |                 | 3.67             | 16.40                 | <0.00001                       |
|                | s(Time):Male           |                 | 1.00             | 1.38                  | 0.2400                         |
|                | <b>Parametric term</b> | <b>Estimate</b> | <b><i>SE</i></b> | <b><i>t</i> value</b> | <b><i>pr</i>(&gt;<i>t</i>)</b> |
|                | Sex (Male)             | -0.69           | 0.16             | -4.25                 | <0.00001                       |
| NiV            | <b>Smoothing term</b>  |                 | <b>edf</b>       | <b><i>F</i></b>       | <b><i>p</i>-value</b>          |
|                | s(Time):Female         |                 | 3.86             | 20.88                 | <0.00001                       |
|                | s(Time):Male           |                 | 1.86             | 9.60                  | 0.0001                         |
|                | <b>Parametric term</b> | <b>Estimate</b> | <b><i>SE</i></b> | <b><i>t</i> value</b> | <b><i>pr</i>(&gt;<i>t</i>)</b> |
|                | Sex (Male)             | -0.67           | 0.15             | -4.36                 | <0.0001                        |
| HeV            | <b>Smoothing term</b>  |                 | <b>edf</b>       | <b><i>F</i></b>       | <b><i>p</i>-value</b>          |
|                | s(Time):Female         |                 | 3.92             | 69.17                 | <0.00001                       |
|                | s(Time):Male           |                 | 3.71             | 75.47                 | <0.00001                       |
|                | <b>Parametric term</b> | <b>Estimate</b> | <b><i>SE</i></b> | <b><i>t</i> value</b> | <b><i>pr</i>(&gt;<i>t</i>)</b> |
|                | Sex (Male)             | -0.45           | 0.11             | -4.22                 | <0.0001                        |
| MojV           | <b>Smoothing term</b>  |                 | <b>edf</b>       | <b><i>F</i></b>       | <b><i>p</i>-value</b>          |
|                | s(Time):Female         |                 | 3.81             | 42.00                 | <0.00001                       |
|                | s(Time):Male           |                 | 3.32             | 10.45                 | <0.00001                       |
|                | <b>Parametric term</b> | <b>Estimate</b> | <b><i>SE</i></b> | <b><i>t</i> value</b> | <b><i>pr</i>(&gt;<i>t</i>)</b> |
|                | Sex (Male)             | -0.14           | 0.05             | -2.84                 | 0.0047                         |
| CedV           | <b>Smoothing term</b>  |                 | <b>edf</b>       | <b><i>F</i></b>       | <b><i>p</i>-value</b>          |
|                | s(Time):Female         |                 | 3.86             | 222.10                | <0.00001                       |
|                | s(Time):Male           |                 | 3.85             | 161.30                | <0.00001                       |
|                | <b>Parametric term</b> | <b>Estimate</b> | <b><i>SE</i></b> | <b><i>t</i> value</b> | <b><i>pr</i>(&gt;<i>t</i>)</b> |
|                | Sex (Male)             | -0.04           | 0.04             | -1.21                 | 0.2266                         |

**Supplementary Table S7.** Rapid antibody binding increases in a subset of captive bats sampled five times ( $n = 89$ ). An increase in log-MFI of 0.978 between two sampling points was used to define a rapid increase. Ranges in parentheses indicate estimations using alternative values (1.5 and 0.5, respectively).

| <b>Antigen</b> |                                  | <b>Feb 2019 to<br/>July 2019</b> | <b>July 2019 to<br/>Feb 2020</b> | <b>Feb 2020 to<br/>July 2020</b> | <b>July 2020 to<br/>Oct 2020</b> | <b>Total</b> |
|----------------|----------------------------------|----------------------------------|----------------------------------|----------------------------------|----------------------------------|--------------|
| GhV            | Number of bats showing increases | 7 (2-15)                         | 2 (1-7)                          | 2 (1-13)                         | 10 (1-23)                        | 21 (5-58)    |
|                | Pregnant or lactating females    | 6 (2-12)                         | 1 (0-4)                          | 1 (1-9)                          | 5 (1-11)                         | 13 (4-36)    |
|                | Males                            | 0 (0-2)                          | 1 (1-3)                          | 0 (0-1)                          | 3 (0-8)                          | 4 (1-14)     |
| NiV            | Number of bats showing increases | 4 (1-16)                         | 1 (0-1)                          | 3 (1-9)                          | 8 (4-15)                         | 16 (6-41)    |
|                | Pregnant or lactating females    | 4 (1-14)                         | 0 (0-0)                          | 2 (1-6)                          | 4 (2-8)                          | 10 (4-28)    |
|                | Males                            | 0 (0-1)                          | 1 (0-1)                          | 0 (0-0)                          | 2 (0-3)                          | 3 (0-5)      |
| HeV            | Number of bats showing increases | 2 (0-11)                         | 1 (1-1)                          | 3 (0-5)                          | 5 (1-8)                          | 11 (2-25)    |
|                | Pregnant or lactating females    | 2 (0-11)                         | 0 (0-0)                          | 2 (0-3)                          | 2 (1-4)                          | 6 (1-18)     |
|                | Males                            | 0 (0-0)                          | 1 (1-1)                          | 0 (0-0)                          | 2 (0-3)                          | 3 (1-3)      |
| MojV           | Number of bats showing increases | 2 (0-16)                         | 1 (0-3)                          | 0 (0-7)                          | 1 (1-3)                          | 4 (1-29)     |
|                | Pregnant or lactating females    | 2 (0-11)                         | 0 (0-0)                          | 0 (0-5)                          | 0 (0-1)                          | 2 (0-17)     |
|                | Males                            | 0 (0-4)                          | 1 (0-2)                          | 0 (0-2)                          | 1 (1-1)                          | 2 (1-9)      |
| CedV           | Number of bats showing increases | 0 (0-0)                          | 1 (0-2)                          | 0 (0-1)                          | 1 (0-2)                          | 2 (0-5)      |
|                | Pregnant or lactating females    | 0 (0-0)                          | 1 (0-1)                          | 0 (0-1)                          | 0 (0-0)                          | 1 (0-2)      |
|                | Males                            | 0 (0-0)                          | 0 (0-1)                          | 0 (0-0)                          | 0 (0-0)                          | 0 (0-1)      |

**Supplementary Table S8.** Predictors included in linear mixed-effect models (LMEMs) of log-MFI values for GhV, NiV, HeV, MojV, and CedV in the captive colony, and their respective estimates, standard errors (SE), t statistics (t value), and significance levels ( $pr[>t]$ ).

| <b>Antigen</b> | <b>Predictor</b>    | <b>Estimate</b> | <b>SE</b> | <b>t value</b> | <b>pr(&gt;t)</b> |
|----------------|---------------------|-----------------|-----------|----------------|------------------|
| GhV            | Age 2-3             | -0.72           | 0.07      | -9.94          | <0.00001         |
|                | Age 4-5             | 0.15            | 0.17      | 0.86           | 0.3897           |
|                | Age 6-7             | 0.36            | 0.16      | 2.18           | 0.0304           |
|                | Age 8-12            | 0.52            | 0.17      | 3.05           | 0.0026           |
|                | Pregnant            | 0.15            | 0.08      | 1.72           | 0.0865           |
|                | Lactating           | 0.10            | 0.14      | 0.67           | 0.5046           |
|                | Sex (Male)          | -0.51           | 0.14      | -3.77          | 0.0002           |
|                | Mass/Forearm Length | -0.09           | 0.10      | -0.87          | 0.3847           |
| NiV            | Age 2-3             | -0.82           | 0.07      | -11.37         | <0.00001         |
|                | Age 4-5             | -0.06           | 0.17      | -0.34          | 0.7362           |
|                | Age 6-7             | 0.62            | 0.17      | 3.77           | 0.0002           |
|                | Age 8-12            | 0.39            | 0.17      | 2.25           | 0.0251           |
|                | Pregnant            | 0.17            | 0.08      | 2.09           | 0.0374           |
|                | Lactating           | -0.04           | 0.14      | 0.32           | 0.7515           |
|                | Sex (Male)          | -0.41           | 0.14      | -2.93          | 0.0039           |
|                | Mass/Forearm Length | -0.13           | 0.10      | -1.26          | 0.2096           |
| HeV            | Age 2-3             | -1.06           | 0.06      | -17.54         | <0.00001         |
|                | Age 4-5             | -0.24           | 0.14      | -1.70          | 0.0905           |
|                | Age 6-7             | 0.36            | 0.14      | 2.61           | 0.0098           |
|                | Age 8-12            | -0.14           | 0.14      | -0.99          | 0.3244           |
|                | Pregnant            | 0.17            | 0.07      | 2.41           | 0.0165           |
|                | Lactating           | 0.05            | 0.12      | 0.45           | 0.6500           |
|                | Sex (Male)          | -0.27           | 0.11      | -2.34          | 0.0205           |
|                | Mass/Forearm Length | -0.15           | 0.09      | -1.76          | 0.0797           |
| MojV           | Age 2-3             | -0.22           | 0.05      | -4.36          | <0.0001          |
|                | Age 4-5             | 0.19            | 0.07      | 2.62           | 0.0095           |
|                | Age 6-7             | 0.28            | 0.07      | 4.05           | <0.0001          |
|                | Age 8-12            | 0.23            | 0.07      | 3.13           | 0.0020           |
|                | Pregnant            | 0.26            | 0.06      | 4.26           | <0.0001          |
|                | Lactating           | 0.11            | 0.10      | 1.03           | 0.3060           |
|                | Sex (Male)          | 0.00            | 0.05      | -0.04          | 0.9649           |
|                | Mass/Forearm Length | -0.13           | 0.07      | -1.85          | 0.0646           |
| CedV           | Age 2-3             | -0.43           | 0.03      | -12.61         | <0.00001         |
|                | Age 4-5             | -0.01           | 0.05      | -0.16          | 0.8714           |
|                | Age 6-7             | 0.08            | 0.05      | 1.51           | 0.1319           |
|                | Age 8-12            | -0.26           | 0.06      | -4.73          | <0.00001         |
|                | Pregnant            | 0.00            | 0.05      | 0.04           | 0.9696           |
|                | Lactating           | -0.04           | 0.07      | -0.56          | 0.5729           |
|                | Sex (Male)          | 0.01            | 0.04      | 0.23           | 0.8212           |
|                | Mass/Forearm Length | -0.03           | 0.05      | -0.71          | 0.4764           |

## Supplementary Figures S1-4

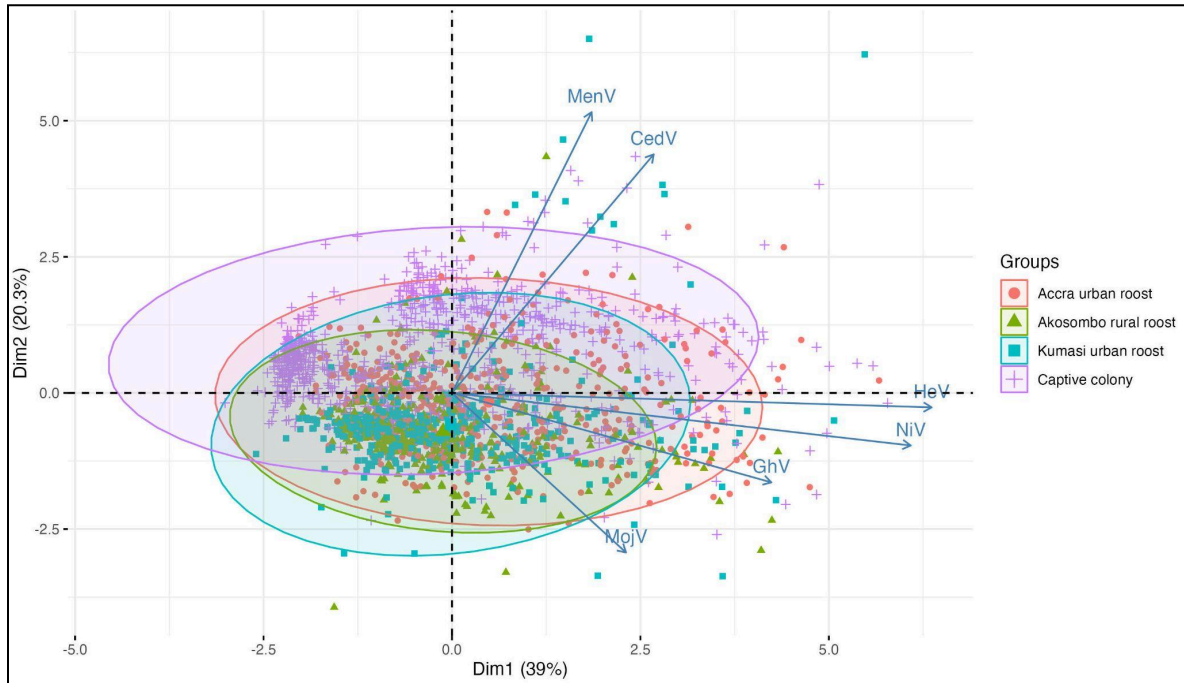

**Supplementary Figure S1.** Bivariate plot of principal component scores from a principal component analysis of log-MFI values from the complete dataset, colour coded by site.

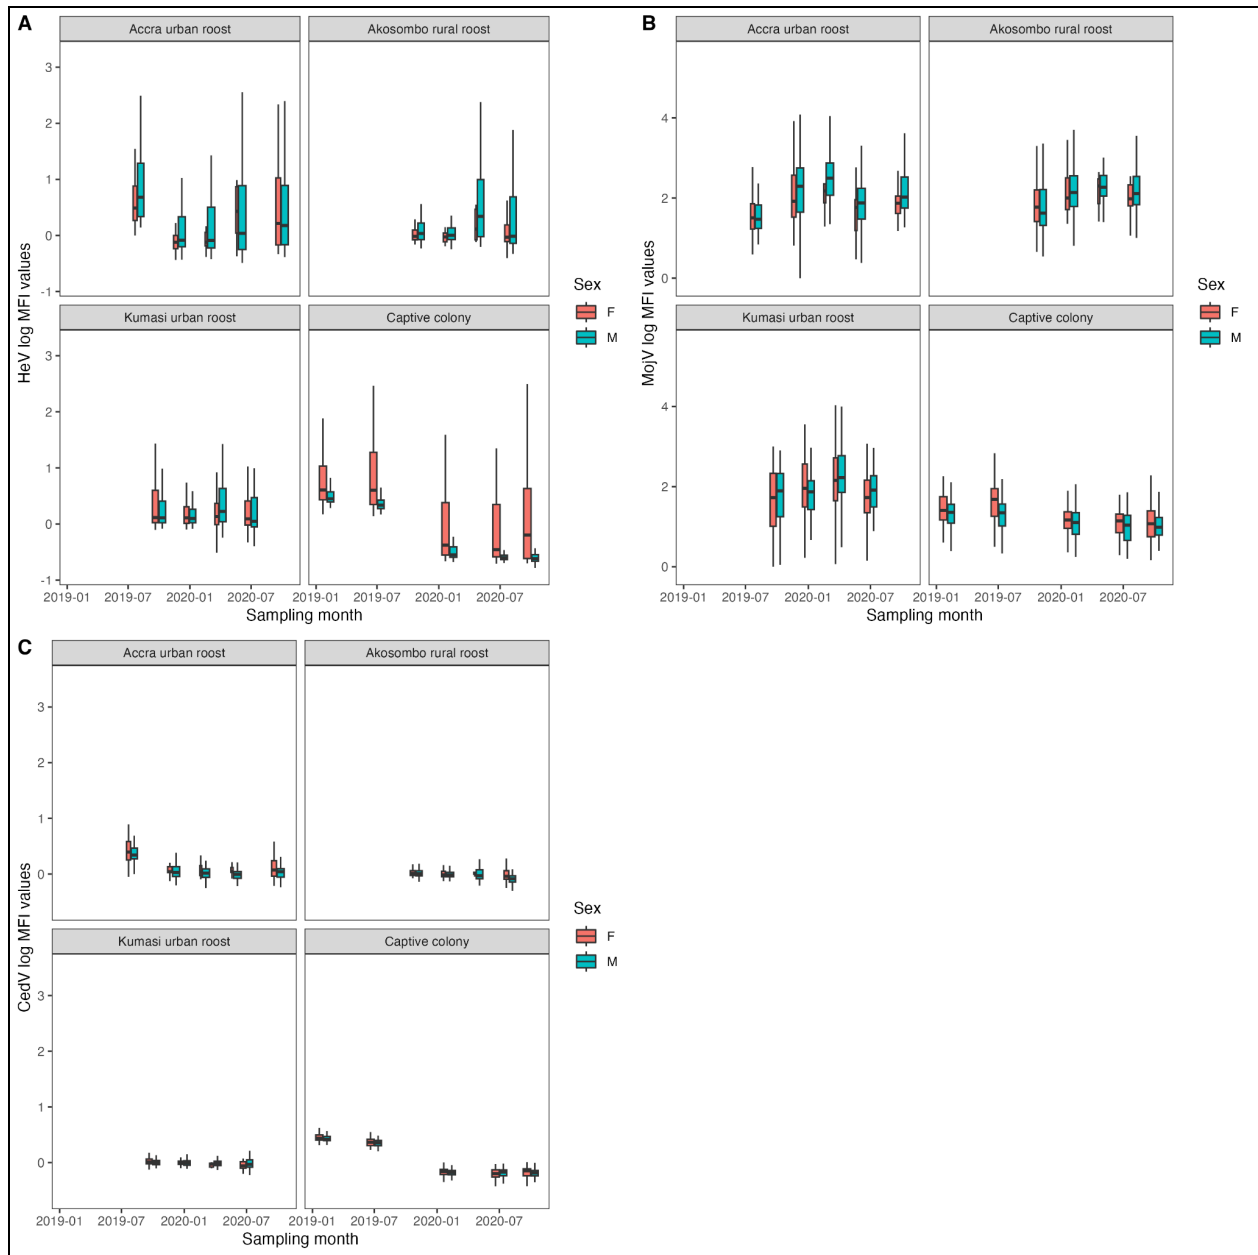

**Supplementary Figure S2.** A) Boxplot of HeV log-MFI values by sampling month and sex across all sites. B) Boxplot of MojV log-MFI values by sampling month and sex across all sites. C) Boxplot of CedV log-MFI values by sampling month and sex across all sites. The width of each box is proportional to the sample size.



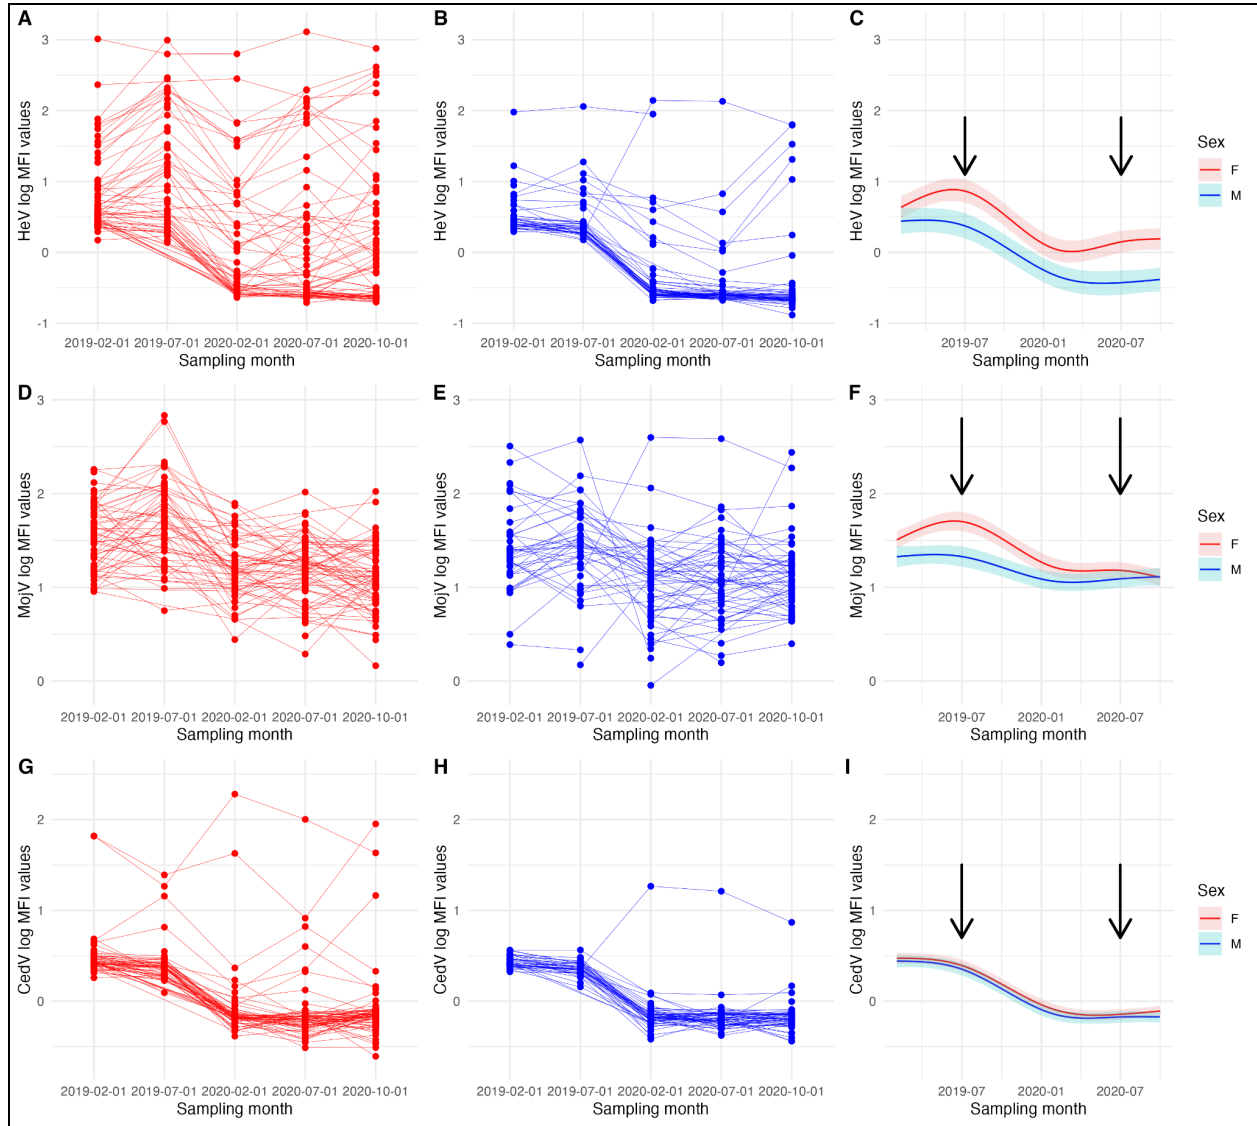

**Supplementary Figure S3.** A) Longitudinal sampling of HeV log-MFI values from all adult female bats in the captive colony. B) Longitudinal sampling of HeV log-MFI values from all adult male bats in the captive colony. C) Generalised additive mixed models fitted to HeV log-MFI values from all captive adults, shown with 95% confidence intervals (Supplementary Table S6). D) Longitudinal sampling of MojV log-MFI values from all adult female bats in the captive colony. E) Longitudinal sampling of MojV log-MFI values from all adult male bats in the captive colony. F) Generalised additive mixed models fitted to MojV log-MFI values from all captive adults, shown with 95% confidence intervals (Supplementary Table S6). G) Longitudinal sampling of CedV log-MFI values from all adult female bats in the captive colony. H) Longitudinal sampling of CedV log-MFI values from all adult male bats in the captive colony. I) Generalised additive mixed models fitted to CedV log-MFI values from all captive adults, shown with 95% confidence intervals (Supplementary Table S6). Arrows indicate sampling periods where (likely near-term) pregnant bats were observed in the colony.

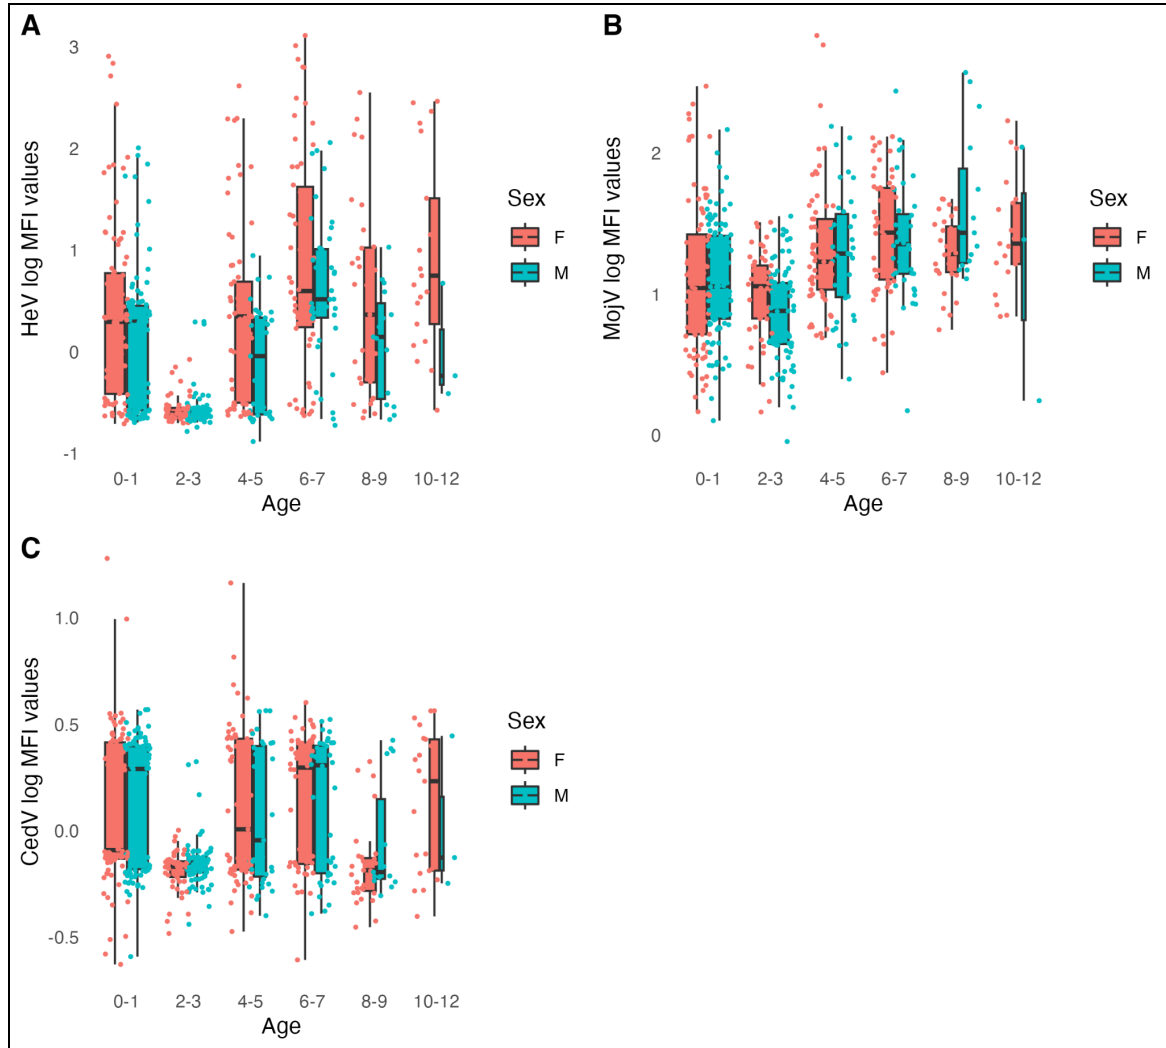

**Supplementary Figure S4.** A) Boxplot of HeV log-MFI values by age and sex in the captive colony. B) Boxplot of MojV log-MFI values by age and sex in the captive colony. C) Boxplot of CedV log-MFI values by age and sex in the captive colony. In all boxplots, the width of boxes represents the relative sample size in each age/sex category and jittered points represent individual bats.
